# Supplementary material for: Optimized monitoring sites for detection of biodiversity trends in China
Source: Springer Nature journal article supplement (doi:10.1007/s10531-017-1339-3), 2017-04-10
Supplement: MOESM1 [file 12213594]

## Supplementary Information for

### Optimized Monitoring Sites for Detection of Biodiversity Trends in China

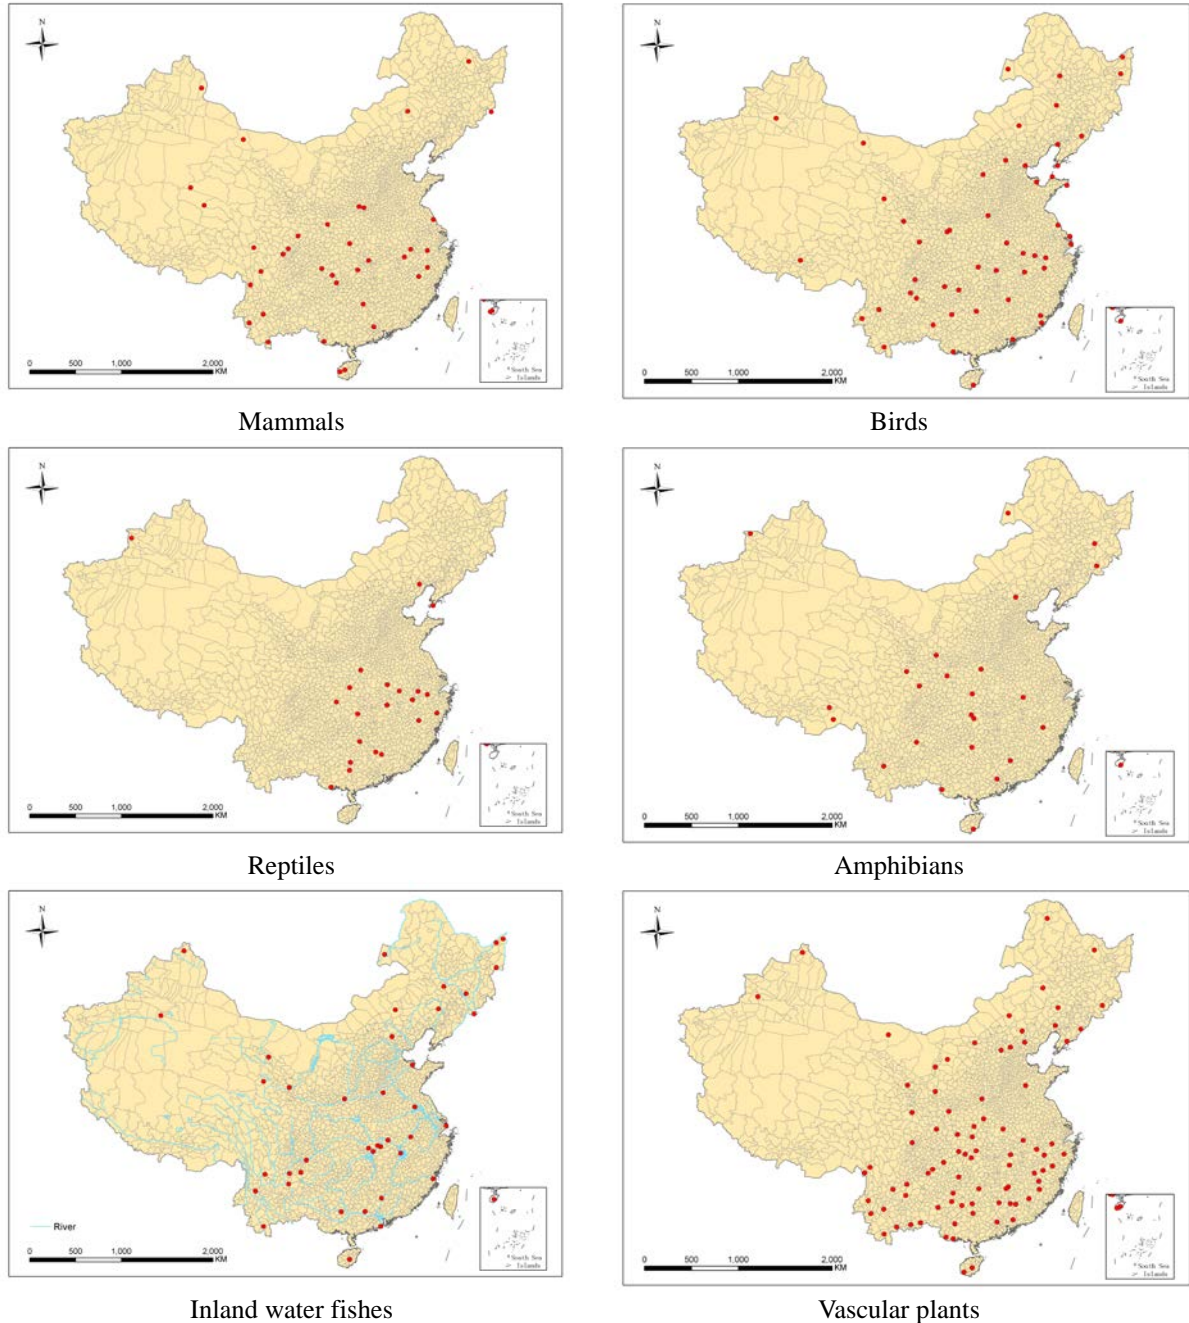

**Figure S1. Essential sites for monitoring of different taxa.** Essential sites for monitoring were selected based on nature reserves' conservation targets, regional distribution and monitoring capacity.

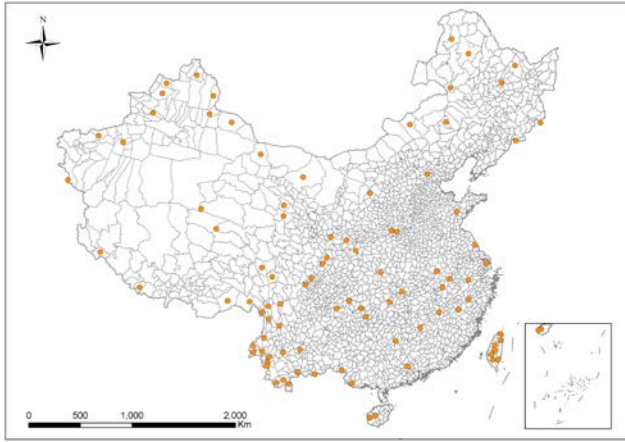

**All mammal species**

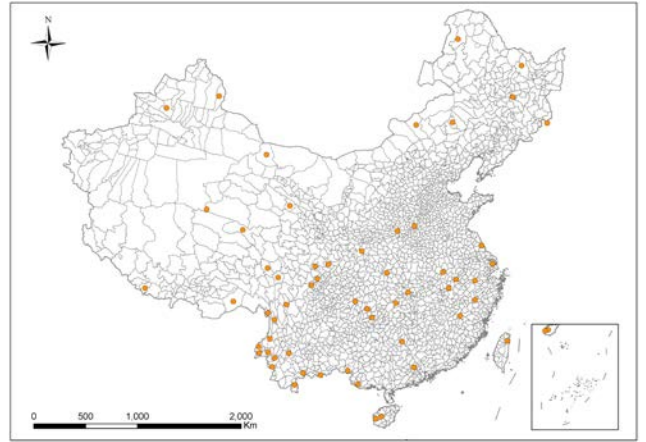

**Threatened mammal species**

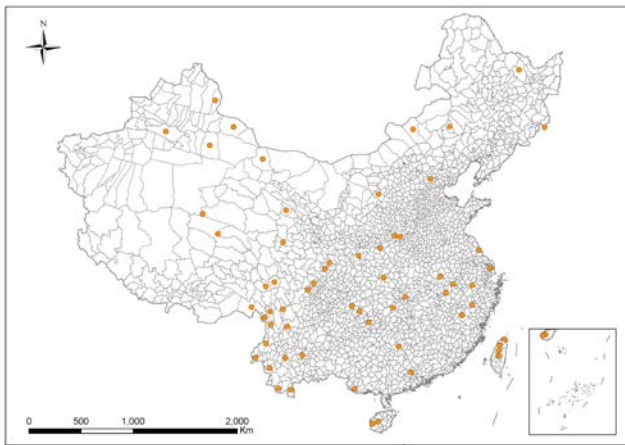

**Mammal species endemic to China**

**Figure S2. Monitoring sites for mammals generated by complementarity analysis covering 100% of mammal species and keeping 100 km apart between any two sites**

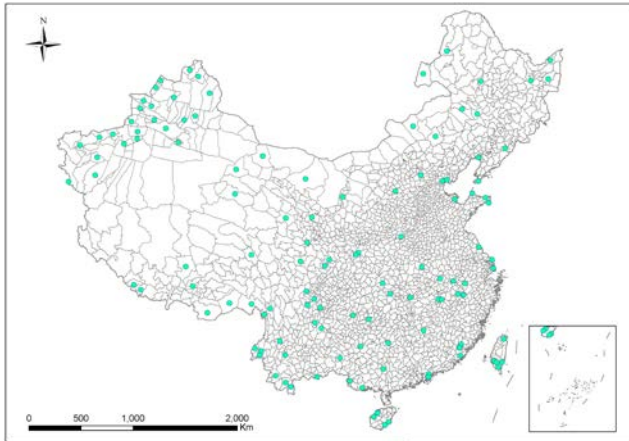

**All bird species**

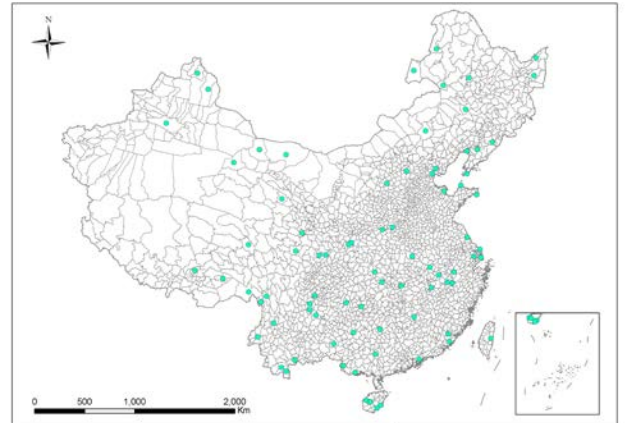

**Threatened bird species**

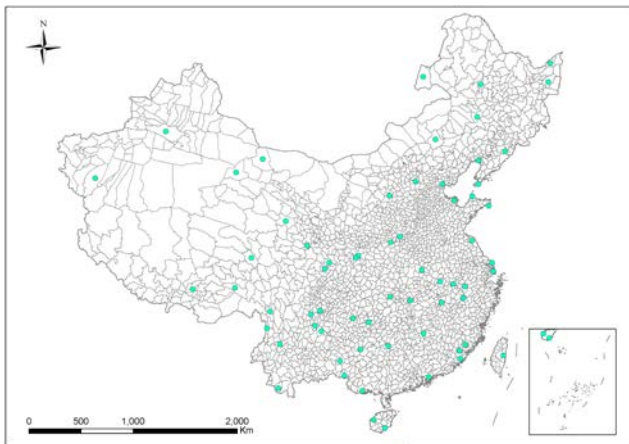

**Bird species endemic to China**

**Figure S3. Monitoring sites for birds generated by complementarity analysis covering 100% of bird species and keeping 100 km apart between any two sites**

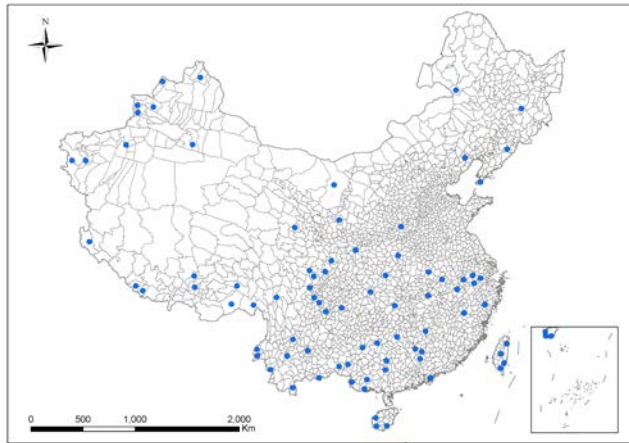

**All reptile species**

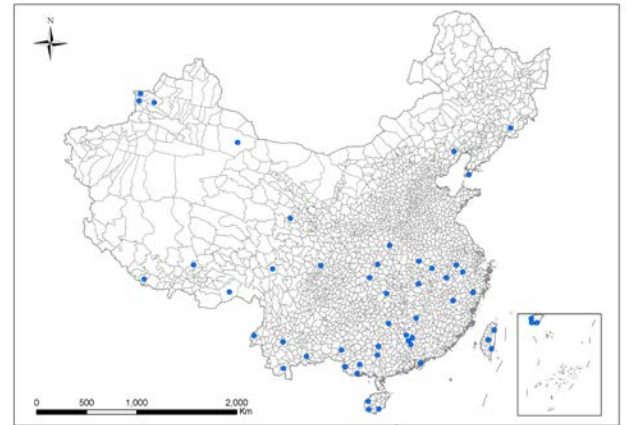

**Threatened reptile species**

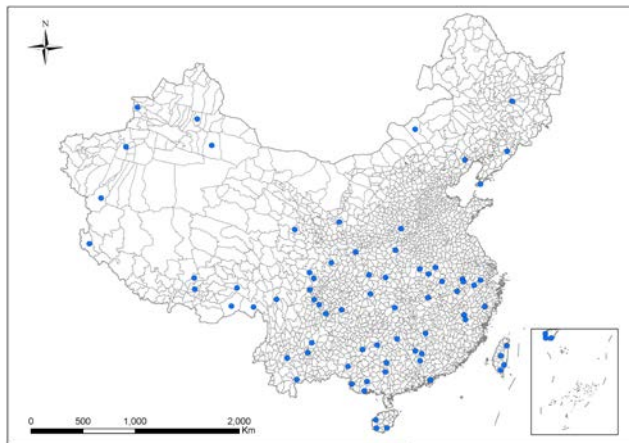

**Reptile species endemic to China**

**Figure S4. Monitoring sites for reptiles generated by complementarity analysis covering 100% of reptile species and keeping 100 km apart between any two sites (for species endemic to China, the distance is 50 km)**

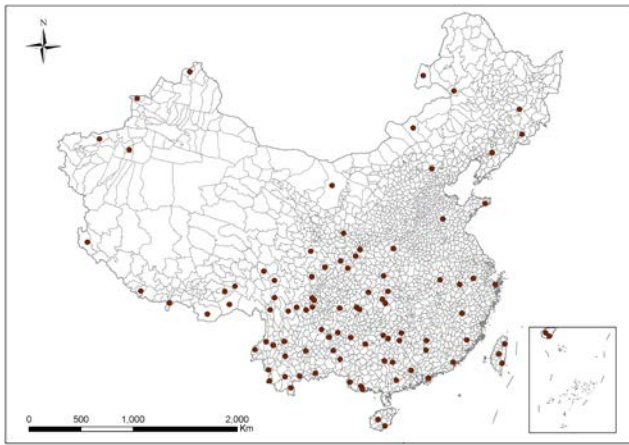

**All amphibian species**

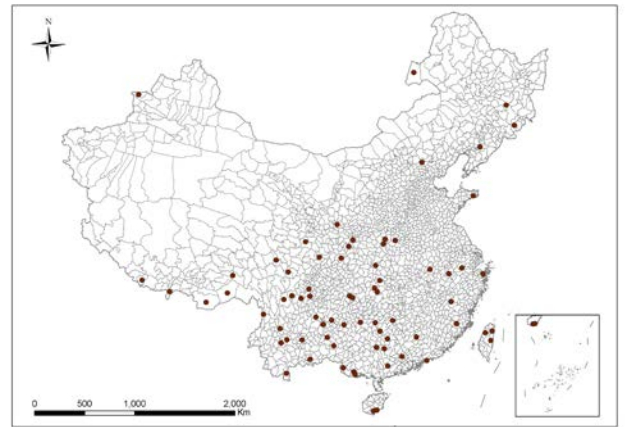

**Threatened amphibian species**

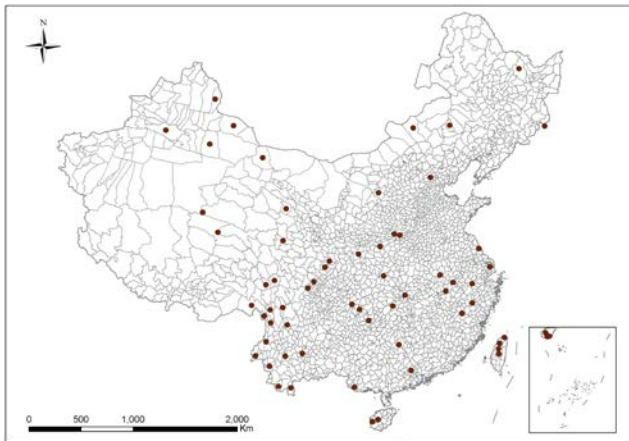

**Amphibian species endemic to China**

**Figure S5. Monitoring sites for amphibians generated by complementarity analysis covering 100% of amphibian species and keeping 100 km apart between any two sites (for threatened species and species endemic to China, the distance is 50 km)**

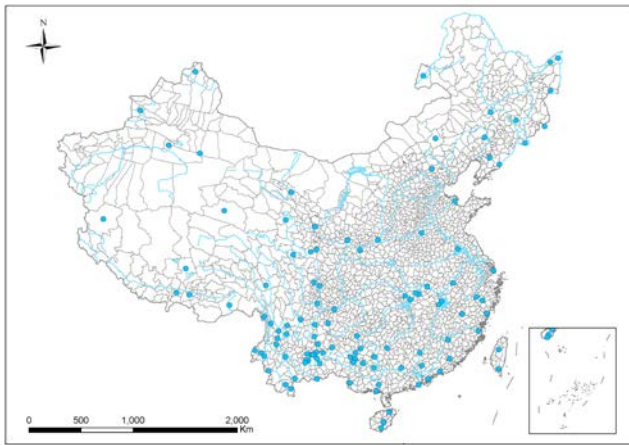

**All inland water fish species**

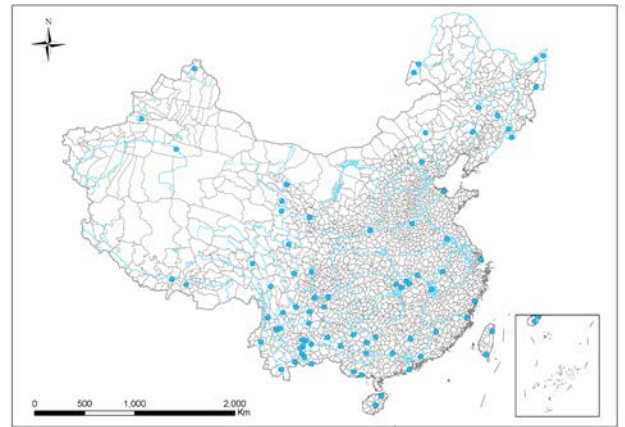

**Threatened inland water fish species**

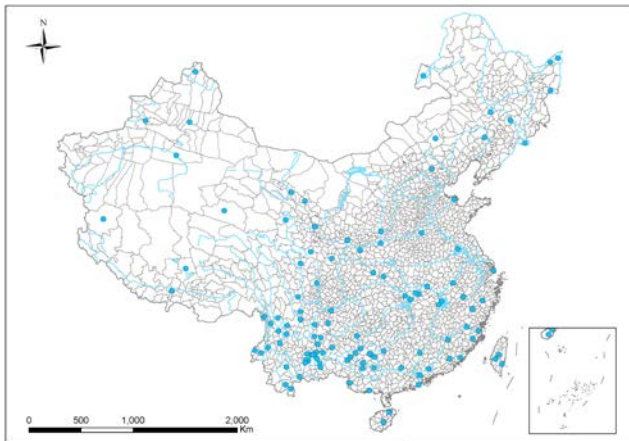

**Inland water fish species endemic to China**

**Figure S6. Monitoring sites for inland water fishes generated by complementarity analysis covering 90% of inland water fish species and keeping 100 km apart between any two sites**

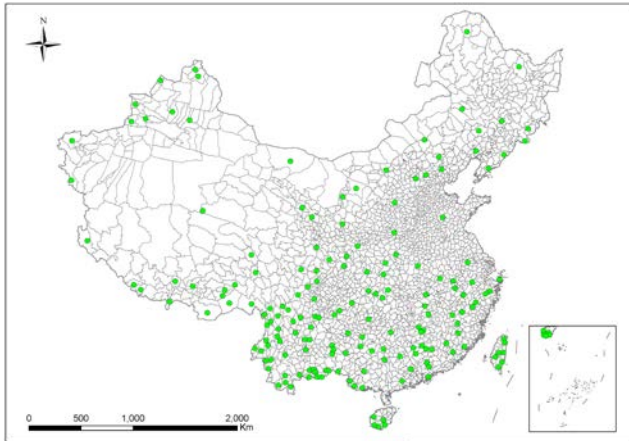

**All vascular plant species**

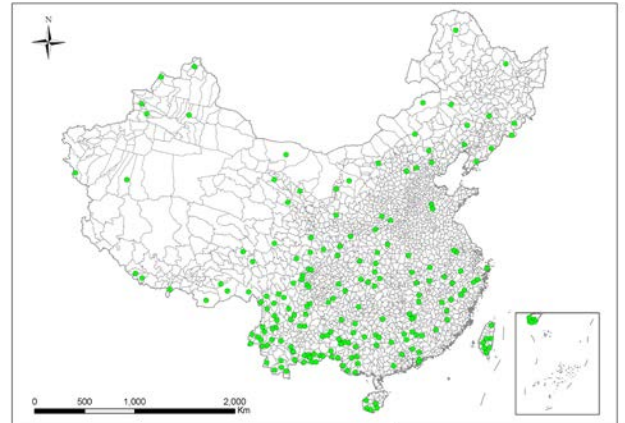

**Threatened vascular plant species**

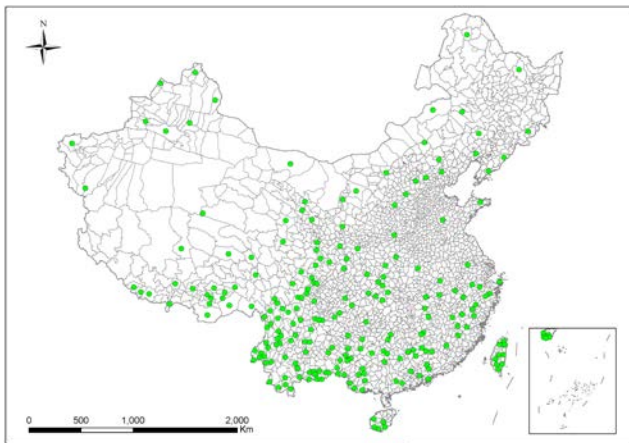

**Vascular plant species endemic to China**

**Figure S7. Monitoring sites for vascular plants generated by complementarity analysis covering 90% of vascular plant species and keeping 50 km apart between any two sites**

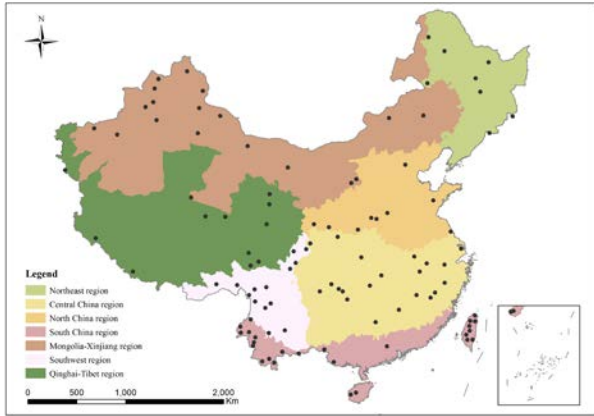

**Mammals**

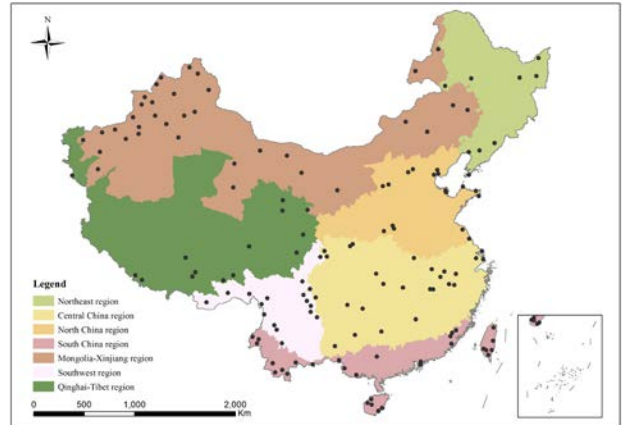

**Birds**

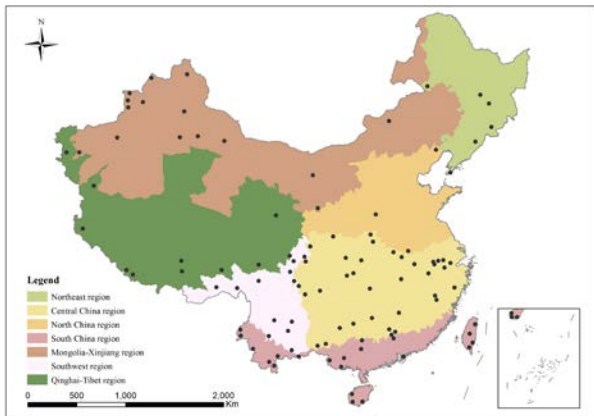

**Reptiles**

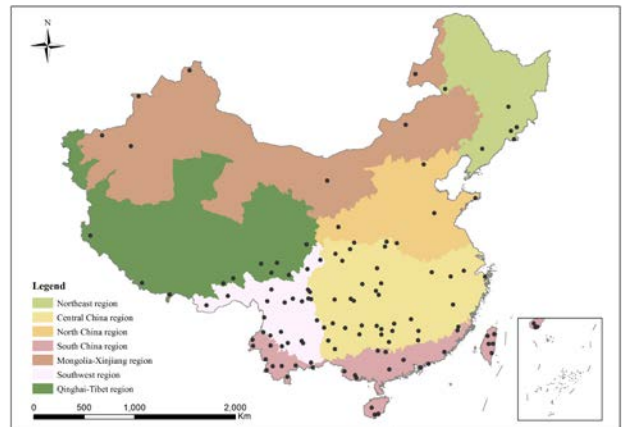

**Amphibians**

**Figure S8. Distribution of optimized monitoring sites for vertebrates within zoogeographical regions.**



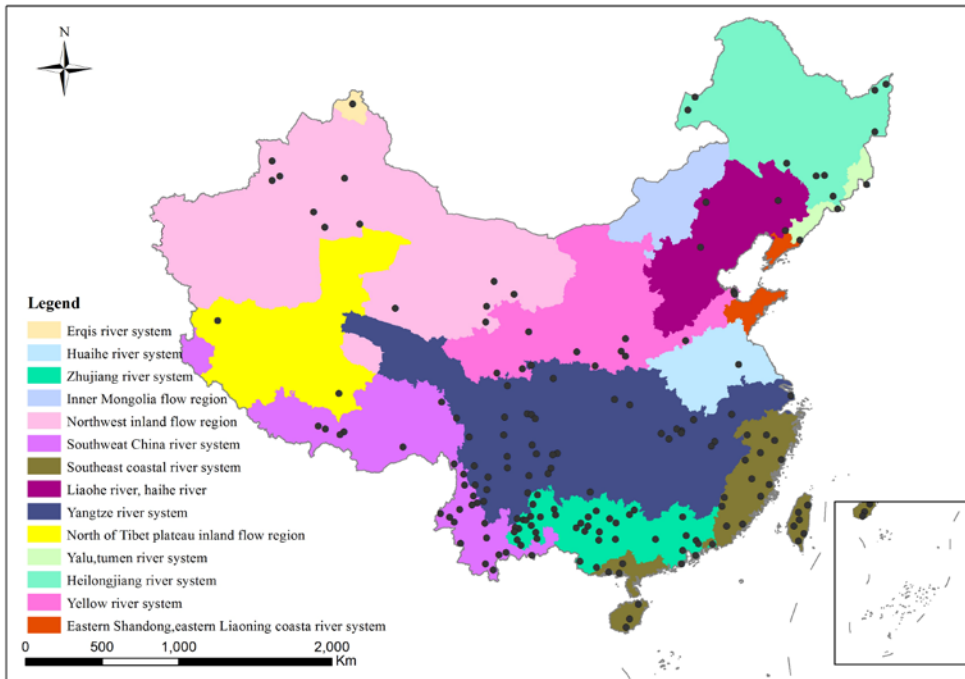

**Figure S9. Distribution of optimized monitoring sites for inland water fishes within watersheds.**

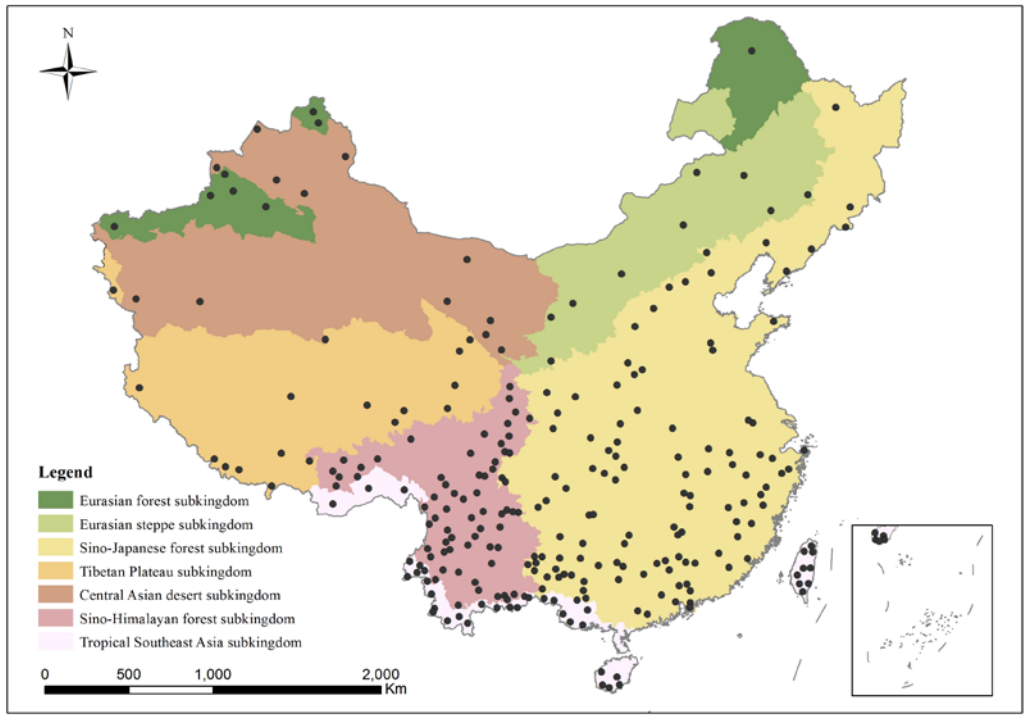

**Figure S10. Distribution of optimized monitoring sites for vascular plants within phytogeographic regions.**

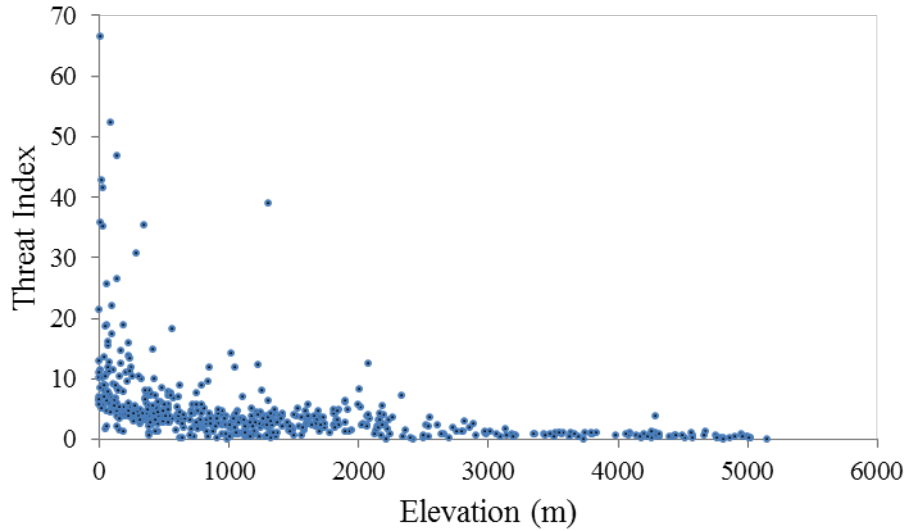

**Figure S11. Distribution of Threat Index of the 564 proposed monitoring sites.** We used the data on population density, GDP density and road density to represent major threats to biodiversity. Each indicator was normalized separately to the range of 0–100. The average value of the three normalized indicators was expressed as the value of Threat Index (TI) for each county. The mean TI was 6.56 for 2376 counties across the whole country. The mean TI for 564 proposed monitoring sites in this study was 4.64, which was obviously larger than that (3.81) of 246 counties where 196 essential nature reserves were distributed. Among the 564 proposed monitoring sites, 98 monitoring sites' TI exceeded the average national level of 6.56, and 230 monitoring sites' TI exceeded 3.81 in the essential nature reserves. Moreover, the mean values of population density, GDP density and road density for 2376 counties were 440.43 people/km<sup>2</sup>, 1788.64 ten thousand yuan/km<sup>2</sup>, and 278.70 m/km<sup>2</sup>, respectively. 75, 62, and 107 monitoring sites showed a higher level than mean values for 2376 counties respectively in terms of population density, GDP density and road density. Population density, GDP density or road density in half of the monitoring sites exceeded 114.57 people/km<sup>2</sup>, 158.93 ten thousand yuan/km<sup>2</sup>, and 173.61 m/km<sup>2</sup>, respectively. Therefore, we consider that the gradient of stressors has been relatively well addressed within the proposed monitoring network.

**Table S1 Number of monitoring sites for mammals calculated by complementarity analysis under different distance and species coverage scenarios**

| Distance (km)                   | Species coverage (%) |    |    |     |
|---------------------------------|----------------------|----|----|-----|
|                                 | 90                   | 95 | 98 | 100 |
| <b>All species</b>              |                      |    |    |     |
| 0                               | 55                   | 66 | 78 | 89  |
| 50                              | 56                   | 66 | 79 | 90  |
| 100                             | 56                   | 66 | 79 | 92  |
| 150                             | 56                   | 66 | 80 | 94  |
| 200                             | 56                   | 67 | 81 | 103 |
| 250                             | 56                   | 67 | 82 | -*  |
| 300                             | 56                   | 68 | 85 | -   |
| <b>Threatened species</b>       |                      |    |    |     |
| 0                               | 42                   | 48 | 52 | 55  |
| 50                              | 42                   | 48 | 52 | 55  |
| 100                             | 42                   | 48 | 53 | 57  |
| 150                             | 42                   | 49 | 53 | 57  |
| 200                             | 42                   | 49 | 53 | 59  |
| 250                             | 42                   | 49 | 54 | 64  |
| 300                             | 45                   | 51 | 56 | 69  |
| <b>Species endemic to China</b> |                      |    |    |     |
| 0                               | 48                   | 54 | 58 | 60  |
| 50                              | 48                   | 54 | 58 | 61  |
| 100                             | 48                   | 54 | 58 | 61  |
| 150                             | 48                   | 54 | 58 | 64  |
| 200                             | 49                   | 55 | 62 | 68  |
| 250                             | 50                   | 55 | 63 | 69  |
| 300                             | 50                   | 56 | 82 | 93  |

\*Note: - no solution, the same as below.

**Table S2 Number of monitoring sites for birds calculated by complementarity analysis under different distance and species coverage scenarios**

| Distance (km)                   | Species coverage (%) |    |     |     |
|---------------------------------|----------------------|----|-----|-----|
|                                 | 90                   | 95 | 98  | 100 |
| <b>All species</b>              |                      |    |     |     |
| 0                               | 69                   | 76 | 92  | 118 |
| 50                              | 69                   | 76 | 92  | 120 |
| 100                             | 69                   | 76 | 94  | 121 |
| 150                             | 69                   | 77 | 96  | 128 |
| 200                             | 69                   | 78 | 97  | 134 |
| 250                             | 69                   | 79 | 103 | -   |
| 300                             | 69                   | 84 | -   | -   |
| <b>Threatened species</b>       |                      |    |     |     |
| 0                               | 64                   | 70 | 75  | 77  |
| 50                              | 64                   | 70 | 75  | 77  |
| 100                             | 65                   | 72 | 78  | 81  |
| 150                             | 66                   | 71 | 77  | 80  |
| 200                             | 67                   | 75 | 82  | 86  |
| 250                             | 68                   | 78 | 91  | 99  |
| 300                             | 71                   | 81 | 96  | -   |
| <b>Species endemic to China</b> |                      |    |     |     |
| 0                               | 57                   | 61 | 63  | 64  |
| 50                              | 57                   | 61 | 63  | 64  |
| 100                             | 58                   | 61 | 63  | 64  |
| 150                             | 58                   | 61 | 63  | 64  |
| 200                             | 58                   | 61 | 64  | 65  |
| 250                             | 60                   | 65 | 71  | 87  |
| 300                             | 59                   | 65 | 74  | 86  |

**Table S3 Number of monitoring sites for reptiles calculated by complementarity analysis under different distance and species coverage scenarios**

| Distance (km)                   | Species coverage (%) |    |     |     |
|---------------------------------|----------------------|----|-----|-----|
|                                 | 90                   | 95 | 98  | 100 |
| <b>All species</b>              |                      |    |     |     |
| 0                               | 50                   | 60 | 72  | 79  |
| 50                              | 50                   | 60 | 72  | 79  |
| 100                             | 50                   | 60 | 72  | 81  |
| 150                             | 50                   | 61 | 74  | 85  |
| 200                             | 50                   | 61 | 75  | 85  |
| 250                             | 51                   | 64 | 82  | 137 |
| 300                             | 51                   | 65 | 86  | -   |
| <b>Threatened species</b>       |                      |    |     |     |
| 0                               | 36                   | 42 | 46  | 48  |
| 50                              | 36                   | 42 | 46  | 48  |
| 100                             | 36                   | 42 | 46  | 48  |
| 150                             | 36                   | 42 | 46  | 48  |
| 200                             | 37                   | 43 | 48  | 51  |
| 250                             | 38                   | 44 | 56  | 60  |
| 300                             | 38                   | 44 | 49  | 55  |
| <b>Species endemic to China</b> |                      |    |     |     |
| 0                               | 50                   | 59 | 64  | 67  |
| 50                              | 51                   | 60 | 65  | 72  |
| 100                             | 52                   | 61 | 67  | -   |
| 150                             | 52                   | 62 | 70  | -   |
| 200                             | 53                   | 62 | 68  | -   |
| 250                             | 54                   | 66 | 93  | -   |
| 300                             | 56                   | 67 | 174 | -   |

**Table S4 Number of monitoring sites for amphibians calculated by complementarity analysis under different distance and species coverage scenarios**

| Distance (km)                   | Species coverage (%) |    |     |     |
|---------------------------------|----------------------|----|-----|-----|
|                                 | 90                   | 95 | 98  | 100 |
| <b>All species</b>              |                      |    |     |     |
| 0                               | 51                   | 69 | 80  | 87  |
| 50                              | 51                   | 69 | 80  | 87  |
| 100                             | 53                   | 70 | 82  | 93  |
| 150                             | 53                   | 70 | 82  | 98  |
| 200                             | 53                   | 71 | 85  | 99  |
| 250                             | 56                   | 75 | 96  | 116 |
| 300                             | 57                   | 75 | 88  | -   |
| <b>Threatened species</b>       |                      |    |     |     |
| 0                               | 52                   | 60 | 65  | 68  |
| 50                              | 52                   | 60 | 65  | 72  |
| 100                             | 52                   | 60 | 66  | -   |
| 150                             | 51                   | 59 | 67  | -   |
| 200                             | 52                   | 62 | 69  | -   |
| 250                             | 54                   | 65 | 74  | -   |
| 300                             | 55                   | 63 | 75  | -   |
| <b>Species endemic to China</b> |                      |    |     |     |
| 0                               | 59                   | 70 | 77  | 81  |
| 50                              | 59                   | 70 | 78  | 83  |
| 100                             | 60                   | 71 | 79  | -   |
| 150                             | 60                   | 72 | 86  | -   |
| 200                             | 61                   | 79 | 97  | -   |
| 250                             | 65                   | 81 | 112 | -   |
| 300                             | 65                   | 81 | 107 | -   |

**Table S5 Number of monitoring sites for inland water fishes calculated by complementarity analysis under different distance and species coverage scenarios**

| Distance (km)                   | Species coverage (%) |     |     |     |
|---------------------------------|----------------------|-----|-----|-----|
|                                 | 90                   | 95  | 98  | 100 |
| <b>All species</b>              |                      |     |     |     |
| 0                               | 109                  | 146 | 181 | 203 |
| 50                              | 109                  | 149 | 182 | -   |
| 100                             | 112                  | 153 | 188 | -   |
| 150                             | 115                  | 163 | 208 | -   |
| 200                             | 124                  | 177 | -   | -   |
| 250                             | 139                  | 266 | -   | -   |
| 300                             | 159                  | -   | -   | -   |
| <b>Threatened species</b>       |                      |     |     |     |
| 0                               | 72                   | 81  | 86  | 89  |
| 50                              | 73                   | 82  | 87  | 93  |
| 100                             | 78                   | 88  | -   | -   |
| 150                             | 78                   | 89  | -   | -   |
| 200                             | 83                   | 97  | -   | -   |
| 250                             | 87                   | 117 | -   | -   |
| 300                             | 105                  | 139 | -   | -   |
| <b>Species endemic to China</b> |                      |     |     |     |
| 0                               | 110                  | 141 | 162 | 175 |
| 50                              | 111                  | 142 | 163 | 193 |
| 100                             | 111                  | 142 | 166 | -   |
| 150                             | 115                  | 147 | 179 | -   |
| 200                             | 126                  | 162 | 200 | -   |
| 250                             | 138                  | 201 | -   | -   |
| 300                             | 165                  | -   | -   | -   |



**Table S6 Number of monitoring sites for vascular plants calculated by complementarity analysis under different distance and species coverage scenarios**

| Distance (km)                   | Species coverage (%) |     |     |     |
|---------------------------------|----------------------|-----|-----|-----|
|                                 | 90                   | 95  | 98  | 100 |
| <b>All species</b>              |                      |     |     |     |
| 0                               | 177                  | 276 | 448 | 840 |
| 50                              | 177                  | 276 | 449 | 871 |
| 100                             | 178                  | 276 | 448 | -   |
| 150                             | 182                  | 281 | 468 | -   |
| 200                             | 192                  | 307 | -   | -   |
| 250                             | 210                  | -   | -   | -   |
| 300                             | -                    | -   | -   | -   |
| <b>Threatened species</b>       |                      |     |     |     |
| 0                               | 192                  | 265 | 360 | 426 |
| 50                              | 193                  | 266 | 360 | 432 |
| 100                             | 194                  | 268 | 362 | 477 |
| 150                             | 201                  | 279 | 373 | 577 |
| 200                             | 208                  | 358 | 506 | -   |
| 250                             | 216                  | -   | -   | -   |
| 300                             | -                    | -   | -   | -   |
| <b>Species endemic to China</b> |                      |     |     |     |
| 0                               | 224                  | 341 | 516 | 548 |
| 50                              | 224                  | 341 | 516 | -   |
| 100                             | 225                  | 342 | 517 | -   |
| 150                             | 229                  | 346 | 527 | -   |
| 200                             | 241                  | 393 | -   | -   |
| 250                             | 267                  | -   | -   | -   |
| 300                             | -                    | -   | -   | -   |
